# Integrative analysis of Dupuytren's disease identifies novel risk locus and reveals a shared genetic etiology with BMI

Megan Major,<sup>1</sup> Malika K Freund,<sup>2</sup> Kathryn S Burch,<sup>1</sup> Nicholas Mancuso,<sup>3</sup> Michael Ng,<sup>4</sup> Dominic Furniss,<sup>4,5,6</sup> Bogdan Pasaniuc,<sup>1,2,3,7,9</sup> Roel Ophoff<sup>2,8,9\*</sup>

<sup>1</sup> Bioinformatics Interdepartmental Program, University of California Los Angeles, Los Angeles, California, 90095, USA

<sup>2</sup> Department of Human Genetics, David Geffen School of Medicine, University of California Los Angeles, Los Angeles, California, 90095, USA

<sup>3</sup> Department of Pathology and Laboratory Medicine, David Geffen School of Medicine, University of California Los Angeles, Los Angeles, California, 90095, USA

<sup>4</sup> Nuffield Department of Orthopaedics, Rheumatology, and Musculoskeletal Science, University of Oxford, Oxford, OX3 7HE, UK

<sup>5</sup> Department of Plastic and Reconstructive Surgery, Oxford University Hospitals NHS Foundation Trust, John Radcliffe Hospital, Oxford, OX3 9DU, UK

<sup>6</sup> NIHR Biomedical Research Centre, NDORMS, University of Oxford, Oxford, OX3 7HE, UK

<sup>7</sup> Department of Biomathematics, David Geffen School of Medicine, University of California Los Angeles, Los Angeles, California, 90095, USA

<sup>8</sup> Center for Neurobehavioral Genetics, University of California Los Angeles, Los Angeles, California, 90095, USA

<sup>9</sup> These authors jointly supervised this work.

Correspondence: \* [ROphoff@mednet.ucla.edu](mailto:ROphoff@mednet.ucla.edu)

## 1 Abstract

2 Dupuytren's disease is the common inherited tissue-specific fibrotic disorder. It's characterized  
3 by progressive and irreversible fibroblastic proliferation affecting the palmar fascia of the hand,  
4 with an onset typically in the sixth decade of life. Although genome-wide association studies  
5 (GWAS) have identified 24 genomic regions associated with Dupuytren's risk, the biological  
6 mechanisms driving signal at these regions remain elusive. We identify potential biological  
7 mechanisms for Dupuytren's disease by integrating the most recent, largest GWAS ( $n_{cases} =$   
8  $3,871$ ,  $n_{controls} = 4,686$ ) with eQTLs (47 tissue panels from five consortia, total  $n = 3,975$ ) to  
9 perform a transcriptome-wide association study (TWAS). We identify 43 tissue-specific gene  
10 associations with Dupuytren's risk, one of which resides at least 0.5 Mb away from the 24 risk  
11 regions previously identified. We also estimate the genome-wide genetic correlation between  
12 Dupuytren's disease and 45 complex traits and find significant genetic correlations between  
13 Dupuytren's disease and body mass index ( $\hat{r}_g = -0.20$ ,  $P = 1.6 \times 10^{-6}$ ), type II diabetes  
14 ( $\hat{r}_g = -0.18$ ,  $P = 1.7 \times 10^{-4}$ ), triglycerides ( $\hat{r}_g = -0.14$ ,  $P = 3.5 \times 10^{-4}$ ), and high-density  
15 lipoprotein ( $\hat{r}_g = 0.13$ ,  $P = 4.1 \times 10^{-4}$ ), which suggests a shared genetic etiology. We further  
16 refine the genome-wide genetic correlation signal to identify 8 regions significantly negatively  
17 correlated with BMI and 3 regions significantly correlated (1 positively and 2 negatively  
18 correlated) with HDL; none of these regions contained the novel gene association identified by  
19 TWAS. Our results are consistent with previous epidemiological findings which show that lower  
20 BMI increases risk for Dupuytren's disease. These 12 novel risk regions provide new insight into  
21 the biological mechanisms of Dupuytren's disease and serve as a starting point for functional  
22 validation.

## 23 Introduction

24 Dupuytren's disease (DD [MIM: 126900]) is a common and disabling connective tissue disorder  
25 affecting 5-25% of individuals of European ancestry, characterized by progressive and  
26 irreversible fibroblastic proliferation affecting the palmar fascia of the hand<sup>1,2</sup>. DD initially  
27 manifests as nodules in the palm of the hand, resulting in contraction and ultimately flexion  
28 contractures of the digits in a proportion of individuals affected with DD. Recent twin studies  
29 estimate the heritability (i.e., proportion of phenotypic variation explained by genetics) of DD to  
30 be ~80%<sup>3</sup>. The largest previous genome-wide association study (GWAS) of DD in individuals of  
31 European ancestry identified 26 genome-wide significant single-nucleotide polymorphism (SNP)  
32 associations in 24 independent risk regions<sup>4</sup>, and estimated the proportion of phenotypic variance  
33 attributable to additive effects of common variants (i.e., SNP-heritability) to be 0.53<sup>4,5</sup>. The vast  
34 majority (23 of 24) of DD associations lie in non-coding genomic regions with only one located  
35 in an intron<sup>4</sup>, thus the biological implications of these associations are not immediately clear.  
36 Investigations into the mechanisms behind the strongest GWAS association, rs16879765  
37 ( $P_{GWAS} = 7.2 \times 10^{-41}$ ), located in the intron of *EPDR1*, revealed an effect on expression and  
38 protein secretion of the nearby gene *SFRP4*<sup>4</sup> but implicated *EPDR1* functionally<sup>6</sup>. Overall, the  
39 regulatory mechanisms driving signal at the GWAS associations on DD remains unknown.

40 In this study, we aimed to explore genetic mechanisms at known risk regions for DD,  
41 identify complex traits with possible shared genetic etiologies, and find novel risk regions for  
42 DD. Recently, transcriptome-wide association studies<sup>7,8</sup> (TWAS) have emerged as a way to  
43 identify associations between gene expression and a trait. We performed a multi-tissue TWAS by  
44 combining a recent DD GWAS<sup>4</sup> with expression quantitative trait loci<sup>9-14</sup> (eQTL), integrating  
45 gene expression from five consortia in 43 unique tissues, to test for association between

46 expression and DD in 15,198 genes. We identified 43 associations between tissue-specific gene  
47 expression and DD, including one novel risk region on chromosome 17. Next, we aimed to  
48 understand the genetic relationship between DD and 45 other complex phenotypes by identifying  
49 traits that have genetic correlation (i.e., the similarity in genetic effects across two traits)  
50 providing etiological insights and plausible causal relationships to investigate<sup>15-18</sup>. We performed  
51 genetic correlation analyses through cross-trait linkage disequilibrium (LD) score regression<sup>15</sup>  
52 (LDSC), and find that body mass index (BMI), type II diabetes (T2D), triglycerides (TG), and  
53 high-density lipoprotein (HDL) levels are significantly genetically correlated with DD.  
54 Additionally, we sought to further refine and understand these relationships with DD and BMI,  
55 T2D, TG, and HDL by exploring local regions with enrichments of genetic correlation using  $\rho$ -  
56 HESS<sup>16</sup>, and found 8 risk regions significantly correlated with BMI and 3 risk regions  
57 significantly correlated with HDL. Finally, we aimed to identify a tissue or cell type to prioritize  
58 when studying DD.

## 59 Materials and Methods

### 60 DD GWAS summary statistics

61 Results from a GWAS of DD in UK Europeans (3,871 cases and 4,686 controls) were previously  
62 reported<sup>4</sup>. This GWAS summary data contained association statistics for 7,218,238 SNPs, with  
63 6,991,033 SNPs that were imputed from individuals of European ancestry in the Haplotype  
64 Reference Consortium<sup>19</sup>. We excluded multi-allelic SNPs, SNPs with ambiguous alleles (e.g., A  
65 to T or C to G), and SNPs without an rsID defined by dbSNP144, resulting in 6,126,071 SNPs  
66 for downstream analyses.

67 We used PLINK<sup>20</sup> to compute independent risk regions (at least one SNP with  $P_{GWAS} \leq$   
68  $5 \times 10^{-8}$ ) in the DD GWAS data by clumping SNPs into regions based on LD and distance,  
69 using  $R^2$  thresholds of 0.3 and 0.25 for between-block LD and within-block LD, respectively.  
70 This resulted in 24 independent risk regions.

## 71 TWAS reference panels and details

72 To find novel risk genes and biologically meaningful associations, we performed a TWAS to test  
73 genes expression levels for association with DD. We used FUSION<sup>7</sup> software (see Web  
74 Resources) along with prepackaged gene expression weights. Briefly, TWAS identifies candidate  
75 risk genes for DD by integrating results from GWAS and reference panels of gene expression  
76 measurements from eQTL studies to associate cis-regulated expression with DD, while  
77 accounting for LD. Weights for gene expression were from the Genotype-Tissue Expression  
78 Project<sup>9</sup> v6 (GTEx; 43 tissues,  $n = 449$ ), the Metabolic Syndrome in Men study<sup>10</sup> (METSIM;  
79 adipose,  $n = 563$ ), the Young Finns Study<sup>11,12</sup> (YFS; blood,  $n = 1,264$ ), the CommonMind  
80 Consortium<sup>13</sup> (CMC; dorsolateral prefrontal cortex,  $n = 452$ ), and the Netherlands Twin  
81 Registry<sup>14</sup> (NTR; blood,  $n = 1,247$ ) reference panels. This totaled to 47 different reference  
82 tissue panels that represent 43 unique tissues (see Supplementary Table 1). Description of quality  
83 control procedures for these expression data have been previously described<sup>7,21</sup>.

84 For each reference gene expression panel, FUSION estimates the strength of association  
85 between predicted expression of a gene and DD ( $Z_{TWAS}$ ) as a function of the vector of GWAS  
86 summary Z-scores at a given cis-region ( $Z_{GWAS}$ ) and the LD-adjusted weights vector learned  
87 from the gene expression data. A p-value ( $P_{TWAS}$ ) is obtained using a two-tailed test under  
88  $N(0,1)$ . This process was repeated for each reference tissue panel and gene, resulting in 98,147

89 tissue-specific gene models involving 15,189 genes (see Supplementary Table 1). We assessed  
90 significance with the family-wise error rate threshold at  $P_{TWAS} \leq \frac{0.05}{98,147}$ .

## 91 Genome-wide genetic correlation with cross-trait LDSC

92 We estimate genome-wide genetic correlation between DD and 45 complex traits to identify  
93 shared genetic risk for DD with other complex traits. To this end, we used cross-trait LDSC<sup>15</sup>, a  
94 method for estimating genome-wide genetic correlation between two traits that requires only  
95 GWAS summary statistics and reference panel LD (European ancestry from the 1000 Genomes  
96 (1000G) Project<sup>22</sup>). We defined the genetic correlation ( $\hat{r}_g$ ) between DD and another trait as  
97 significant if it passed the Bonferroni-corrected threshold of  $P_{T1,T2} \leq \frac{0.05}{45}$ .

## 98 Local genetic correlation and putative causality using $\rho$ -HESS

99 For each of the traits with significant genome-wide genetic correlation with DD, we run  $\rho$ -  
100 HESS<sup>16</sup> to estimate the local genetic correlation between each trait and DD within 1702  
101 approximately independent regions genome-wide<sup>23</sup>. For reference LD, we used European  
102 ancestry from the 1000G Project<sup>22</sup>. The local genetic correlation ( $\hat{r}_{g,local}$ ) between two traits at a  
103 given region was defined as significant if it passed the threshold of  $P_{region} \leq \frac{0.05}{1702}$ .

104 We also aimed to find evidence for putative causal relationships between DD and other  
105 genetically correlated traits. We used the implementation in  $\rho$ -HESS based on a previously  
106 described method<sup>18</sup> to prioritize putative causal models between pairs of complex traits.  
107 Essentially, for two complex traits, the local genetic correlation is evaluated at regions harboring  
108 genome-wide significant GWAS signals specific to each trait. The local genetic correlation for  
109 all trait 1 specific regions are summed ( $\hat{r}_{T1,regions}$ ) and the local genetic correlation for all trait 2

110 specific regions are summed ( $\hat{r}_{T2,regions}$ ). Confidence intervals are determined by 1.96 times  
111 jackknife standard error on each side; significance is determined if the confidence intervals do  
112 not overlap. The intuition behind this test is that if trait 1 causally influences trait 2 then trait 1  
113 specific regions would have strong genetic correlation with trait 2 but trait 2 specific regions  
114 would not have strong genetic correlation with trait 1. Thus, we can leverage the difference in  
115 correlations for trait-specific signal at these regions to see if the correlations are consistent with a  
116 suggestive causal model<sup>16,18</sup>.

### 117 Tissue and cell type prioritization

118 To identify tissues and/or cell types that are biologically relevant to DD, we used stratified LD  
119 score regression to estimate the enrichment of DD SNP-heritability in 205 publicly available  
120 specifically expressed gene (SEG) annotations, each of which represents a set of genes that are  
121 specifically expressed in a single tissue or cell type (LDSC-SEG)<sup>24</sup>. Briefly, the 205 annotations  
122 were originally created from two datasets: RNA-seq gene expression measurements in 53 human  
123 tissues from GTEx v6p<sup>9</sup> (average of 161 samples per tissue), and a microarray gene expression  
124 dataset comprised of 152 tissues and cell types from either human, mouse, or rat (the “Franke  
125 Lab” dataset)<sup>25,26</sup>. For each set of specifically expressed genes, an annotation was created by  
126 adding 100-kb windows upstream and downstream from the transcribed region of each gene. In  
127 addition, we tested for enrichment of DD SNP-heritability in a set of 489 publicly available  
128 tissue- or cell type-specific chromatin annotations<sup>24</sup>. 396 of these annotations were originally  
129 created from five activating histone marks (H3K27ac, H3K4me3, H3K4me1, H3K9ac, and  
130 H3K36me3) and DNase I hypersensitivity (DHS) regions that were present in a subset of 88  
131 tissues and cell types in the Roadmap Epigenomics Consortium<sup>27</sup>. An additional 93 annotations  
132 were created from a set of four activating histone marks (H3K27ac, H3K4me3, H3K4me1, and

133 H3K36me3) in 27 tissues from EN-TE<sup>x</sup><sup>28</sup> that were also present in GTEx. Details on the  
134 construction of both the SEG annotations and chromatin-based annotations can be found in the  
135 original study<sup>24</sup>. Each annotation was tested individually for enrichment of DD SNP-heritability  
136 on top of the baseline-LD model<sup>29</sup> by assessing whether the expected additional per-SNP  
137 heritability contribution due to the annotation is significantly nonzero (FDR < 0.1).

138 We also employed the web application FUMA<sup>30</sup> in the aim of finding tissues or cell types  
139 with differentially expressed genes relevant to DD. FUMA maps GWAS results to create a gene  
140 set in three ways: (1) physical proximity on the genome, (2) eQTL associations, and (3)  
141 chromatin interaction. We used the gene property analyses (implemented from MAGMA<sup>31</sup>) and  
142 differentially expressed gene (DEG) analysis to prioritize different tissues or cell types. For the  
143 gene property analysis, FUMA tests if expression of the GWAS gene set in a single tissue or cell  
144 type is statistically different than the average expression of the GWAS gene set across all tissues  
145 or cell types. We perform this gene property analysis in 53 GTEx<sup>9</sup> tissues ( $P_{GP,T} \leq \frac{0.05}{53}$ ) as well  
146 as in 5115 study-defined cell types ( $P_{GP,CT} \leq \frac{0.05}{5115}$ ) using single cell RNA-seq data from 28  
147 studies<sup>32-58</sup> as described on the FUMA website (see Web Resources). For the DEG analysis,  
148 FUMA defines differentially expressed genes in each tissue by performing a two-sided t-test for  
149 that one tissue against all other tissues. Each of the 53 GTEx<sup>9</sup> tissues is tested for up-regulation,  
150 down-regulation, and both-sided DEG sets. We removed tissues where DEG sets had less than  
151 30 genes to avoid underpowered correlations; significance was defined by Bonferroni correction  
152 for the number of tests ( $P_{DEG} \leq \frac{0.05}{153}$ ).



## 153 Results

### 154 TWAS identifies 18 risk genes for DD

155 To explore putative biological mechanisms at known DD risk regions, we performed a multi-  
156 tissue TWAS to identify genes (specifically, cis-regulated gene expression), associated with DD  
157 (see Materials and Methods). Briefly, TWAS identifies candidate risk genes for DD by  
158 integrating results from GWAS and reference panels of gene expression measurements from  
159 eQTL studies to associate cis-regulated expression with DD, while accounting for LD. We used  
160 tissue reference panels from GTEx<sup>9</sup>, METSIM<sup>10</sup>, YFS<sup>11,12</sup>, CMC<sup>13</sup>, and NTR<sup>14</sup> resulting in 47  
161 different reference tissue panels with a combined sample size of 3,975 (see Materials and  
162 Methods; Supplementary Table 1). Using these reference panels, we tested 98,147 tissue-specific  
163 gene models and found 43 significant tissue-specific gene-trait associations at a Bonferroni-  
164 corrected threshold of  $P_{TWAS} \leq \frac{0.05}{98,147}$  (Table 1, Supplementary Table 2). GWAS SNP  
165 association strength and TWAS tissue-specific gene model association strength can be seen in  
166 Figure 1. These 43 significant models were composed of 18 genes among 23 tissue panels—7  
167 genes were significant in multiple tissues (Table 1). 36 of the 43 significant tissue-specific gene  
168 models were within 0.5Mb of any of the previously identified 24 risk regions.

169 One region of interest is on chromosome 7, where *EPDR1* was found to be significant in  
170 10 different tissue panels (most significant in lung tissue,  $P_{TWAS} = 6.4 \times 10^{-31}$ ). This region has  
171 been previously investigated because of its strong association signal (Odds Ratio 1.93 and  
172  $P_{GWAS} = 7.2 \times 10^{-41}$ ) with DD<sup>4</sup>. The variant with the strongest association in this region,  
173 rs16879765, is in an intron of *EPDR1*. Although decreased secretion of the nearby WNT-agonist  
174 *SFRP4* was correlated with the high risk genotype<sup>4</sup>, genetic and functional evidence point toward

175 *EPDR1* being the disease-relevant gene for this region, which has been functionally validated as  
176 contributing to myofibroblast contractility<sup>6</sup>. All three transcripts of *EPDR1* are found in affected  
177 DD tissue and knockdown of *EPDR1* attenuates contractility in fibroblast-populated collagen  
178 lattice assays<sup>6</sup>.

179 TWAS identifies novel risk region on chromosome 17

180 To identify possible novel risk regions from TWAS associations, we aimed to see if tissue-  
181 specific gene models were independent of established GWAS associations. After grouping  
182 association signal into 1Mb regions, we found 13 regions with only significant GWAS SNP(s), 1  
183 region with only significant TWAS model(s), and 11 regions with both significant GWAS  
184 SNP(s) and TWAS model(s). Here we define a region identified through TWAS to be novel if  
185 (1) the strongest DD associated SNP in the gene's region is not genome-wide significant (i.e.,  
186  $P_{GWAS} \geq 5 \times 10^{-8}$ ) and (2) that the TSS of the TWAS-gene is not within 0.5Mb of the  
187 previously known 24 risk regions. With these constraints, we identified one novel risk region for  
188 DD (Figure 2). To ensure our result was robust to long-range LD, we expanded our window  
189 criteria to include 1Mb and 2Mb and found no change. We found a single tissue-specific gene  
190 model, *TMEM106A* ( $P_{TWAS} = 1.2 \times 10^{-7}$ ; GTEx breast mammary tissue), was significantly  
191 associated with DD risk at this region (Figure 2). To determine that the *TMEM106A* association  
192 was robust to possible LD confounding, we performed a permutation test using GWAS summary  
193 statistics and found similar results ( $P_{perm} = 8.91 \times 10^{-3}$ ). There were 12 tissue panels that  
194 expression for *TMEM106A* was modeled from (Supplementary Table 3).

195 Estimates of SNP-heritability in DD are higher than previously proposed

196 We obtained a SNP-heritability estimate of 0.67 (s.e. = 0.08), using LDSC<sup>59</sup>. We also used  
197 Heritability Estimator from Summary Statistics (HESS), a previously described method using  
198 similar framework as  $\rho$ -HESS that estimates local SNP-heritability, and found the total SNP-  
199 heritability to be 0.532 (s.e. = 0.282), similar to the previous estimate of 0.533 using GCTA<sup>4,5</sup>.  
200 Because HESS is optimized for GWAS with sample sizes greater than 50,000 (contributing the  
201 large standard error), we included the LDSC regression estimate of SNP-heritability when  
202 running HESS to obtain more stable estimates of local SNP-heritability<sup>59,60</sup>.

203 Genetic correlation suggests shared genetic etiology with DD

204 To identify traits that have a shared genetic etiology with DD, we used cross-trait LDSC<sup>15</sup> which  
205 estimates the genetic correlation between two traits using GWAS summary statistics (see  
206 Materials and Methods). Results for the genetic correlation test between DD and 45 other traits  
207 (average sample size 132,115) can be found in Table 2. These 45 traits include a variety of  
208 anthropometric, immune, hematological, neurological, and cardiovascular related traits and  
209 disorders. Four traits were found to have significant genetic correlation with DD ( $P_{T1,T2} \leq \frac{0.05}{45}$ ,  
210 identical results correcting for a FDR < 0.1): body mass index (BMI),  $\hat{r}_g = -0.196$ ; high density  
211 lipoprotein (HDL),  $\hat{r}_g = 0.133$ ; triglycerides (TG),  $\hat{r}_g = -0.139$ ; and type II diabetes (T2D),  
212  $\hat{r}_g = -0.182$  (Table 2). These results are compatible with previous observational studies<sup>2,61,62</sup>.  
213 Notably, the negative genetic correlation between BMI and DD is consistent with a previous  
214 epidemiological investigation showing that the risk of DD was inversely proportional to BMI,  
215 after correcting for age, race, and sex in 14,844 patients diagnosed with DD<sup>63</sup>.

216 Local genetic correlation analysis yields 11 regions to further study

217 Having found evidence for BMI, HDL, TG, and T2D sharing genetic factors with DD at a  
218 genome-wide scale, we next aimed to locate possible shared genomic regions. We did this by  
219 running  $\rho$ -HESS<sup>16</sup> to estimate the local genetic correlation between DD and each of the four  
220 traits in 1702 approximately independent LD blocks<sup>23</sup> (see Materials and Methods). The  
221 genome-wide genetic correlation results from cross-trait LDSC and  $\rho$ -HESS are fairly consistent  
222 (Pearson's  $r = 0.94$ ; Supplementary Table 4); differences may have resulted from using  
223 metabochip array<sup>64</sup> GWAS statistics with LDSC (HDL and TG), which is discouraged for cross-  
224 trait LDSC<sup>15</sup>, as well as smaller sample size in the DD GWAS adding noise to estimates from  $\rho$ -  
225 HESS<sup>16,60</sup>. We found eight regions significantly genetically correlated ( $P_{region} \leq \frac{0.05}{1702}$ ) between  
226 DD and BMI, three regions between DD and HDL, and no regions between DD and TG or  
227 between DD and T2D (Table 3). Of these 11 regions, three contained a genome-wide significant  
228 association in the DD GWAS<sup>4</sup>. Only one of the 11 regions contained significant tissue-specific  
229 gene models from TWAS; the 10 models for *EPDR1* were within the DD and HDL genetically  
230 correlated 7:37555184-38966703 region (Supplemental Table 2, Table 3).

231 Genetic correlation patterns of BMI/TG and DD consistent with putative causality

232 To further elucidate the relationships of these traits with DD, we used  $\rho$ -HESS<sup>16</sup> to test for  
233 evidence of putative causality through GWAS estimated genetic effects for BMI, HDL, TG, and  
234 T2D acting on DD or vice versa (see Materials and Methods). Both BMI and TG showed  
235 suggestive patterns that would be consistent with a putative causal relationship with DD, while  
236 HDL and T2D did not (Figure 3, Supplemental Figure 1). For example, when considering BMI  
237 and DD, the correlation at 399 BMI-specific regions ( $-0.27$ , s.e. = 0.044) is seemingly stronger

238 than the correlation at 19 DD-specific regions (-0.03, s.e. = 0.15), indicating that regions that  
239 increase BMI tend to decrease risk of DD; this is consistent with a model where BMI genetic  
240 effects decrease risk of DD (Figure 3). The same is true for TG and DD; the correlation at 65  
241 TG-specific regions (-0.3, s.e. = 0.08) is seemingly stronger than the correlation at 22 DD-  
242 specific regions (0.018, s.e. = 0.2; Figure 3). Both of these results are not significant (assessed by  
243 overlap of confidence intervals,  $\hat{r}_{TX,regions} \pm 1.96 \times \text{s.e.}$ ); this is most likely because of the  
244 relatively reduced sample size in the DD GWAS study. Nonetheless, there is evidence of a  
245 putative causal relationship with BMI affecting TG<sup>16,18</sup> and results from TG and DD may be  
246 from a mediated causal relationship of BMI affecting TG, which in turn affects DD (Figure 3).

247 DD most relevant tissue or cell type unidentifiable with current data

248 Finally, we aimed to identify relevant tissues or cell types for DD. First, we used S-LDSC<sup>65</sup> to  
249 estimate the enrichment of SNP-heritability of DD (controlling for the baseline-LD model<sup>29</sup>) in  
250 two sets of publicly available annotations<sup>24</sup>: annotations representing specifically expressed  
251 genes (SEG) in 205 tissues or cell types<sup>9,25,26</sup> and 489 annotations representing 6 chromatin  
252 features (DHS and 5 histone marks) in 91 tissues or cell types<sup>27,28</sup>. Among the 205 SEG  
253 annotations, synovial membrane tissue was the most enriched for DD SNP-heritability on top of  
254 the baseline-LD model, but none of the 205 annotations were statistically significant (FDR < 0.1;  
255 Supplementary Table 5). Among the 489 chromatin annotations, we found that esophageal-  
256 mucosa tissue was the most enriched for DD SNP-heritability, however none of 489 annotations  
257 were statistically significant (FDR < 0.1; Supplementary Table 6). Next, we prioritized tissues  
258 and cell types using FUMA<sup>30</sup>, a platform to visualize and interpret GWAS summary statistics  
259 (see Materials and Methods). After using FUMA to create a gene set from the GWAS statistics,  
260 we first performed a gene property analysis (which tests if gene expression in a single tissue or

261 cell type is statistically different than the average gene expression across all tissues or cell types)  
262 in 53 tissue types<sup>9</sup>. Although none of the 53 tissues showed a significant effect ( $P_{GP,T} \leq \frac{0.05}{53}$ ), the  
263 effect was strongest in cell transformed fibroblasts (Supplementary Table 7). We then assessed  
264 whether the GWAS gene set was enriched in any of the differentially expressed gene (DEG) sets  
265 for tissues. The up-regulated DEG sets for tibial artery and aorta tissues both demonstrated  
266 significant ( $P_{DEG} = 5.5 \times 10^{-5}$  and  $7.8 \times 10^{-5}$ , respectively) overlap with the GWAS gene set  
267 (Supplementary Table 8). We also performed a gene property analysis using cell type specific  
268 expression data for 5115 study-defined cell types from 28 scRNA-seq studies<sup>32-58</sup>. While none of  
269 the single cell types were significant ( $P_{GP,CT} \leq \frac{0.05}{5115}$ ), stromal cells and muscle cells were among  
270 the top five results (Supplementary Table 9). As a final analysis, we averaged the  $\chi^2$ -statistic  
271 ( $Z_{TWAS}^2$ ) for the 43 significant TWAS models within each tissue to determine which tissue had  
272 the most enrichment of TWAS signal. We found adipose subcutaneous tissue was most enriched  
273 among the 23 tissues with significant TWAS models (Supplementary Figure 2). Because of the  
274 lack of consistency between methods and lack of statistical significance in many methods, we are  
275 lead to believe that likely the relevant tissue or cell type is not represented in current datasets.

## 276 Discussion

277 In this work, we aimed to better understand the genetic architecture of DD, find plausible  
278 biological mechanisms at known risk regions for DD, understand the relationship between DD  
279 and a variety of other traits, and identify possible novel risk regions through local genetic  
280 correlation with other traits or genetic-mediated gene expression effects. We highlight that the  
281 estimated SNP-heritability of DD (0.53-0.67) is relatively close to estimates of heritability from  
282 twin studies (0.8). We also note that the strong concentration of DD GWAS signal in a handful

283 of genomic regions is more consistent with an oligogenic architecture than a polygenic one,  
284 suggesting that further functional studies could be particularly fruitful as compared to more  
285 polygenic traits and diseases. We also identify a negative genetic correlation between DD and  
286 BMI, supporting a previous epidemiological study that observationally showed a negative  
287 correlation between the traits<sup>63</sup>; understanding the relationship between DD and BMI as well as  
288 that between DD and TG could shed light on shared biologically important pathways. Finally, we  
289 identify one novel risk region from TWAS, and identify 11 regions with significant local genetic  
290 correlation between DD and BMI or HDL. Overall, our findings highlight the need for more  
291 investigation into these regions as a first step.

292         Additionally, we note a few caveats in our results. First, though the sample size of 8,557  
293 for the DD GWAS is the largest yet, it is possible that additional GWAS regions remain  
294 undiscovered due to the limit in power and this also would further reduce power to fully detect  
295 associations and relationships with other traits. Second, while the patterns of genetic correlation  
296 between BMI and DD as well as TG and DD are somewhat consistent with causal relationships,  
297 true causality between these traits cannot be determined without functional experimentation.  
298 Third, we emphasize that TWAS may not detect the true mechanism of disease if the gene  
299 expression is not mediated through genetics or if disease-relevant tissue is not well-represented  
300 in available gene expression reference panels. This may be further illustrated by the fact we were  
301 unable to identify a specific tissue or cell type to prioritize for further study in DD. This could  
302 also be due to the small sample size of the DD GWAS, the cell-type specificity of enhancer  
303 elements, or again the publication bias away from musculoskeletal connective tissues, leading to  
304 a gap in the available datasets.

305 Future work should be taken in multiple directions. First, we provide additional evidence  
306 that *EPDR1* may contribute to the pathogenesis of DD; further work should be dedicated to  
307 functionally validate and understand this gene in connection with DD, as it may represent an  
308 attractive therapeutic target. Second, there is strong evidence for a relationship between BMI/TG  
309 and DD—elucidating the mechanism may lead to interesting observations with implications for  
310 the treatment of both traits. Third, additional GWAS, with larger sample sizes and in additional  
311 populations, will uncover more of the contribution of genetic variation to DD. And fourth, given  
312 the putative oligogenic architecture of DD, and that our tissue and cell type analyses lacked  
313 consistent results, it might also be rewarding to generate more functional -omics data, such as  
314 reference gene expression panels or chromatin accessibility data in the palmar fascia tissue.  
315 These resources would offer valuable insight into the underlying mechanisms of DD and  
316 opportunity to explore therapeutic avenues.

## 317 Supplemental Data

318 Supplemental Data includes two figures and nine tables.

## 319 Acknowledgements

320 This work was supported by National Institutes of Health (NIH) awards R01HG009120,  
321 R01MH115676, R01HG006399, and U01CA194393. M.K.F. is funded by NIH-NCI National  
322 Cancer Institute T32LM012424; K.S.B. is funded by NIH Training Grant in Genomic Analysis  
323 and Interpretation T32HG002536; D.F. is funded by an Intermediate Fellowship from the  
324 Wellcome Trust (097152/Z/11/Z). This work was also supported by the NIHR Biomedical  
325 Research Centre, Oxford.

## 326 Declaration of Interests

327 The authors declare no competing interests.

## 328 Web Resources

329 OMIM, <https://www.omim.org/>



- 330 1000 Genomes, <http://www.internationalgenome.org/>
- 331 PLINK, <https://www.cog-genomics.org/plink2/>
- 332 FUSION, <http://gusevlab.org/projects/fusion/>
- 333 GTEx Portal, <https://gtexportal.org/home/>
- 334 LD scores and annotations, <https://data.broadinstitute.org/alkesgroup/LDSCORE/>
- 335 DEPICT, [https://data.broadinstitute.org/mpg/depict/depict\\_download/tissue\\_expression/](https://data.broadinstitute.org/mpg/depict/depict_download/tissue_expression/)
- 336 FUMA, <http://fuma.ctglab.nl/>

## 337 References

- 338 1. Dupuytren, B. (1834). CLINICAL LECTURES ON SURGERY. *Lancet* 22, 222–225.
- 339 2. Gudmundsson, K.G., Arngrimsson, R., Sigfússon, N., Björnsson, Á., and Jónsson, T. (2000).
- 340 Epidemiology of Dupuytren's disease. *J. Clin. Epidemiol.* 53, 291–296.
- 341 3. Larsen, S., Krogsgaard, D.G., Aagaard Larsen, L., Iachina, M., Skytthe, A., and Frederiksen,
- 342 H. (2015). Genetic and environmental influences in Dupuytren's disease: a study of
- 343 30,330 Danish twin pairs. *J. Hand Surg. Eur. Vol.* 40, 171–176.
- 344 4. Ng, M., Thakkar, D., Southam, L., Werker, P., Ophoff, R., Becker, K., Nothnagel, M., Franke,
- 345 A., Nürnberg, P., Espirito-Santo, A.I., et al. (2017). A Genome-wide Association Study
- 346 of Dupuytren Disease Reveals 17 Additional Variants Implicated in Fibrosis. *Am. J.*
- 347 *Hum. Genet.* 101, 417–427.
- 348 5. Yang, J., Lee, S.H., Goddard, M.E., and Visscher, P.M. (2011). GCTA: a tool for genome-
- 349 wide complex trait analysis. *Am. J. Hum. Genet.* 88, 76–82.
- 350 6. Staats, K.A., Wu, T., Gan, B.S., O'Gorman, D.B., and Ophoff, R.A. (2016). Dupuytren's
- 351 disease susceptibility gene, EPDR1, is involved in myofibroblast contractility. *J.*
- 352 *Dermatol. Sci.* 83, 131–137.
- 353 7. Gusev, A., Ko, A., Shi, H., Bhatia, G., Chung, W., Penninx, B.W.J.H., Jansen, R., de Geus,
- 354 E.J.C., Boomsma, D.I., Wright, F.A., et al. (2016). Integrative approaches for large-scale
- 355 transcriptome-wide association studies. *Nat. Genet.* 48, 245–252.
- 356 8. Gamazon, E.R., Wheeler, H.E., Shah, K.P., Mozaffari, S.V., Aquino-Michaels, K., Carroll,
- 357 R.J., Eyster, A.E., Denny, J.C., GTEx Consortium, Nicolae, D.L., et al. (2015). A gene-
- 358 based association method for mapping traits using reference transcriptome data. *Nat.*
- 359 *Genet.* 47, 1091–1098.
- 360 9. GTEx Consortium (2013). The Genotype-Tissue Expression (GTEx) project. *Nat. Genet.* 45,
- 361 580–585.
- 362 10. Laakso, M., Kuusisto, J., Stančáková, A., Kuulasmaa, T., Pajukanta, P., Lusi, A.J., Collins,
- 363 F.S., Mohlke, K.L., and Boehnke, M. (2017). The Metabolic Syndrome in Men study: a
- 364 resource for studies of metabolic and cardiovascular diseases. *J. Lipid Res.* 58, 481–493.
- 365 11. Raitakari, O.T., Juonala, M., Rönnemaa, T., Keltikangas-Järvinen, L., Räsänen, L.,
- 366 Pietikäinen, M., Hutri-Kähönen, N., Taittonen, L., Jokinen, E., Marniemi, J., et al.
- 367 (2008). Cohort profile: the cardiovascular risk in Young Finns Study. *Int. J. Epidemiol.*
- 368 37, 1220–1226.
- 369 12. Nuotio, J., Oikonen, M., Magnussen, C.G., Jokinen, E., Laitinen, T., Hutri-Kähönen, N.,
- 370 Kähönen, M., Lehtimäki, T., Taittonen, L., Tossavainen, P., et al. (2014). Cardiovascular
- 371 risk factors in 2011 and secular trends since 2007: the Cardiovascular Risk in Young
- 372 Finns Study. *Scand. J. Public Health* 42, 563–571.
- 373 13. Fromer, M., Roussos, P., Sieberts, S.K., Johnson, J.S., Kavanagh, D.H., Perumal, T.M.,
- 374 Ruderfer, D.M., Oh, E.C., Topol, A., Shah, H.R., et al. (2016). Gene expression
- 375 elucidates functional impact of polygenic risk for schizophrenia. *Nat. Neurosci.* 19,
- 376 1442–1453.
- 377 14. Wright, F.A., Sullivan, P.F., Brooks, A.I., Zou, F., Sun, W., Xia, K., Madar, V., Jansen, R.,
- 378 Chung, W., Zhou, Y.-H., et al. (2014). Heritability and genomics of gene expression in
- 379 peripheral blood. *Nat. Genet.* 46, 430–437.
- 380 15. Bulik-Sullivan, B., Finucane, H.K., Anttila, V., Gusev, A., Day, F.R., Loh, P.-R., ReproGen

- 381 Consortium, Psychiatric Genomics Consortium, Genetic Consortium for Anorexia  
382 Nervosa of the Wellcome Trust Case Control Consortium 3, Duncan, L., et al. (2015). An  
383 atlas of genetic correlations across human diseases and traits. *Nat. Genet.* *47*, 1236–1241.
- 384 16. Shi, H., Mancuso, N., Spendlove, S., and Pasaniuc, B. (2017). Local Genetic Correlation  
385 Gives Insights into the Shared Genetic Architecture of Complex Traits. *Am. J. Hum.*  
386 *Genet.* *101*, 737–751.
- 387 17. Johnson, R., Shi, H., Pasaniuc, B., and Sankararaman, S. (2018). A unifying framework for  
388 joint trait analysis under a non-infinitesimal model. *Bioinformatics* *34*, i195–i201.
- 389 18. Pickrell, J.K., Berisa, T., Liu, J.Z., Séguérel, L., Tung, J.Y., and Hinds, D.A. (2016). Detection  
390 and interpretation of shared genetic influences on 42 human traits. *Nat. Genet.* *48*, 709–  
391 717.
- 392 19. McCarthy, S., Das, S., Kretzschmar, W., Delaneau, O., Wood, A.R., Teumer, A., Kang,  
393 H.M., Fuchsberger, C., Danecek, P., Sharp, K., et al. (2016). A reference panel of 64,976  
394 haplotypes for genotype imputation. *Nat. Genet.* *48*, 1279–1283.
- 395 20. Purcell, S., Neale, B., Todd-Brown, K., Thomas, L., Ferreira, M.A.R., Bender, D., Maller, J.,  
396 Sklar, P., de Bakker, P.I.W., Daly, M.J., et al. (2007). PLINK: a tool set for whole-  
397 genome association and population-based linkage analyses. *Am. J. Hum. Genet.* *81*, 559–  
398 575.
- 399 21. Mancuso, N., Shi, H., Goddard, P., Kichaev, G., Gusev, A., and Pasaniuc, B. (2017).  
400 Integrating Gene Expression with Summary Association Statistics to Identify Genes  
401 Associated with 30 Complex Traits. *Am. J. Hum. Genet.* *100*, 473–487.
- 402 22. 1000 Genomes Project Consortium, Auton, A., Brooks, L.D., Durbin, R.M., Garrison, E.P.,  
403 Kang, H.M., Korbel, J.O., Marchini, J.L., McCarthy, S., McVean, G.A., et al. (2015). A  
404 global reference for human genetic variation. *Nature* *526*, 68–74.
- 405 23. Berisa, T., and Pickrell, J.K. (2016). Approximately independent linkage disequilibrium  
406 blocks in human populations. *Bioinformatics* *32*, 283–285.
- 407 24. Finucane, H.K., Reshef, Y.A., Anttila, V., Slowikowski, K., Gusev, A., Byrnes, A., Gazal, S.,  
408 Loh, P.-R., Lareau, C., Shores, N., et al. (2018). Heritability enrichment of specifically  
409 expressed genes identifies disease-relevant tissues and cell types. *Nat. Genet.* *50*, 621–  
410 629.
- 411 25. Pers, T.H., Karjalainen, J.M., Chan, Y., Westra, H.-J., Wood, A.R., Yang, J., Lui, J.C.,  
412 Vedantam, S., Gustafsson, S., Esko, T., et al. (2015). Biological interpretation of  
413 genome-wide association studies using predicted gene functions. *Nat. Commun.* *6*, 5890.
- 414 26. Fehrmann, R.S.N., Karjalainen, J.M., Krajewska, M., Westra, H.-J., Maloney, D., Simeonov,  
415 A., Pers, T.H., Hirschhorn, J.N., Jansen, R.C., Schultes, E.A., et al. (2015). Gene  
416 expression analysis identifies global gene dosage sensitivity in cancer. *Nat. Genet.* *47*,  
417 115–125.
- 418 27. Roadmap Epigenomics Consortium, Kundaje, A., Meuleman, W., Ernst, J., Bilenky, M.,  
419 Yen, A., Heravi-Moussavi, A., Kheradpour, P., Zhang, Z., Wang, J., et al. (2015).  
420 Integrative analysis of 111 reference human epigenomes. *Nature* *518*, 317–330.
- 421 28. ENCODE Project Consortium (2012). An integrated encyclopedia of DNA elements in the  
422 human genome. *Nature* *489*, 57–74.
- 423 29. Gazal, S., Finucane, H.K., Furlotte, N.A., Loh, P.-R., Palamara, P.F., Liu, X., Schoech, A.,  
424 Bulik-Sullivan, B., Neale, B.M., Gusev, A., et al. (2017). Linkage disequilibrium-  
425 dependent architecture of human complex traits shows action of negative selection. *Nat.*  
426 *Genet.* *49*, 1421–1427.

- 427 30. Watanabe, K., Taskesen, E., van Bochoven, A., and Posthuma, D. (2017). Functional  
428 mapping and annotation of genetic associations with FUMA. *Nat. Commun.* 8, 1826.
- 429 31. de Leeuw, C.A., Mooij, J.M., Heskes, T., and Posthuma, D. (2015). MAGMA: generalized  
430 gene-set analysis of GWAS data. *PLoS Comput. Biol.* 11, e1004219.
- 431 32. Han, X., Wang, R., Zhou, Y., Fei, L., Sun, H., Lai, S., Saadatpour, A., Zhou, Z., Chen, H.,  
432 Ye, F., et al. (2018). Mapping the Mouse Cell Atlas by Microwell-Seq. *Cell* 172, 1091–  
433 1107.e17.
- 434 33. Tasic, B., Menon, V., Nguyen, T.N., Kim, T.K., Jarsky, T., Yao, Z., Levi, B., Gray, L.T.,  
435 Sorensen, S.A., Dolbeare, T., et al. (2016). Adult mouse cortical cell taxonomy revealed  
436 by single cell transcriptomics. *Nat. Neurosci.* 19, 335–346.
- 437 34. Saunders, A., Macosko, E., Wysoker, A., Goldman, M., Krienen, F., de Rivera, H., Bien, E.,  
438 Baum, M., Wang, S., Goeva, A., et al. (2018). A Single-Cell Atlas of Cell Types, States,  
439 and Other Transcriptional Patterns from Nine Regions of the Adult Mouse Brain.
- 440 35. Habib, N., Avraham-Davidi, I., Basu, A., Burks, T., Shekhar, K., Hofree, M., Choudhury,  
441 S.R., Aguet, F., Gelfand, E., Ardlie, K., et al. (2017). Massively parallel single-nucleus  
442 RNA-seq with DroNc-seq. *Nat. Methods* 14, 955–958.
- 443 36. Zeisel, A., Hochgerner, H., Lönnerberg, P., Johnsson, A., Memic, F., van der Zwan, J.,  
444 Häring, M., Braun, E., Borm, L.E., La Manno, G., et al. (2018). Molecular Architecture  
445 of the Mouse Nervous System. *Cell* 174, 999–1014.e22.
- 446 37. Usoskin, D., Furlan, A., Islam, S., Abdo, H., Lönnerberg, P., Lou, D., Hjerling-Leffler, J.,  
447 Haeggström, J., Kharchenko, O., Kharchenko, P.V., et al. (2015). Unbiased classification  
448 of sensory neuron types by large-scale single-cell RNA sequencing. *Nat. Neurosci.* 18,  
449 145–153.
- 450 38. Zeisel, A., Muñoz-Manchado, A.B., Codeluppi, S., Lönnerberg, P., La Manno, G., Juréus,  
451 A., Marques, S., Munguba, H., He, L., Betsholtz, C., et al. (2015). Brain structure. Cell  
452 types in the mouse cortex and hippocampus revealed by single-cell RNA-seq. *Science*  
453 347, 1138–1142.
- 454 39. Zhou, Y., Al-Saaidi, R.A., Fernandez-Guerra, P., Freude, K.K., Olsen, R.K.J., Jensen, U.B.,  
455 Gregersen, N., Hyttel, P., Bolund, L., Aagaard, L., et al. (2017). Mitochondrial Spare  
456 Respiratory Capacity Is Negatively Correlated with Nuclear Reprogramming Efficiency.  
457 *Stem Cells Dev.* 26, 166–176.
- 458 40. Furlan, A., La Manno, G., Lübke, M., Häring, M., Abdo, H., Hochgerner, H., Kupari, J.,  
459 Usoskin, D., Airaksinen, M.S., Oliver, G., et al. (2016). Visceral motor neuron diversity  
460 delineates a cellular basis for nipple- and pilo-erection muscle control. *Nat. Neurosci.* 19,  
461 1331–1340.
- 462 41. La Manno, G., Gyllborg, D., Codeluppi, S., Nishimura, K., Salto, C., Zeisel, A., Borm, L.E.,  
463 Stott, S.R.W., Toledo, E.M., Villaescusa, J.C., et al. (2016). Molecular Diversity of  
464 Midbrain Development in Mouse, Human, and Stem Cells. *Cell* 167, 566–580.e19.
- 465 42. Hochgerner, H., Zeisel, A., Lönnerberg, P., and Linnarsson, S. (2018). Conserved properties  
466 of dentate gyrus neurogenesis across postnatal development revealed by single-cell RNA  
467 sequencing. *Nat. Neurosci.* 21, 290–299.
- 468 43. Hochgerner, H., Lönnerberg, P., Hodge, R., Mikes, J., Heskol, A., Hubschle, H., Lin, P.,  
469 Picelli, S., La Manno, G., Ratz, M., et al. (2017). STRT-seq-2i: dual-index 5' single cell  
470 and nucleus RNA-seq on an addressable microwell array. *Sci. Rep.* 7, 16327.
- 471 44. Romanov, R.A., Zeisel, A., Bakker, J., Girach, F., Hellysaz, A., Tomer, R., Alpár, A.,  
472 Mulder, J., Clotman, F., Keimpema, E., et al. (2017). Molecular interrogation of

- 473 hypothalamic organization reveals distinct dopamine neuronal subtypes. *Nat. Neurosci.*  
474 *20*, 176–188.
- 475 45. Joost, S., Zeisel, A., Jacob, T., Sun, X., La Manno, G., Lönnerberg, P., Linnarsson, S., and  
476 Kasper, M. (2016). Single-Cell Transcriptomics Reveals that Differentiation and Spatial  
477 Signatures Shape Epidermal and Hair Follicle Heterogeneity. *Cell Syst* *3*, 221–237.e9.
- 478 46. Häring, M., Zeisel, A., Hochgerner, H., Rinwa, P., Jakobsson, J.E.T., Lönnerberg, P., La  
479 Manno, G., Sharma, N., Borgius, L., Kiehn, O., et al. (2018). Neuronal atlas of the dorsal  
480 horn defines its architecture and links sensory input to transcriptional cell types. *Nat.*  
481 *Neurosci.* *21*, 869–880.
- 482 47. Chen, R., Wu, X., Jiang, L., and Zhang, Y. (2017). Single-Cell RNA-Seq Reveals  
483 Hypothalamic Cell Diversity. *Cell Rep.* *18*, 3227–3241.
- 484 48. Vanlandewijck, M., He, L., Mäe, M.A., Andrae, J., Ando, K., Del Gaudio, F., Nahar, K.,  
485 Lebouvier, T., Laviña, B., Gouveia, L., et al. (2018). A molecular atlas of cell types and  
486 zonation in the brain vasculature. *Nature* *554*, 475–480.
- 487 49. Enge, M., Arda, H.E., Mignardi, M., Beausang, J., Bottino, R., Kim, S.K., and Quake, S.R.  
488 (2017). Single-Cell Analysis of Human Pancreas Reveals Transcriptional Signatures of  
489 Aging and Somatic Mutation Patterns. *Cell* *171*, 321–330.e14.
- 490 50. Zhong, S., Zhang, S., Fan, X., Wu, Q., Yan, L., Dong, J., Zhang, H., Li, L., Sun, L., Pan, N.,  
491 et al. (2018). A single-cell RNA-seq survey of the developmental landscape of the human  
492 prefrontal cortex. *Nature* *555*, 524–528.
- 493 51. Gokce, O., Stanley, G.M., Treutlein, B., Neff, N.F., Camp, J.G., Malenka, R.C., Rothwell,  
494 P.E., Fuccillo, M.V., Südhof, T.C., and Quake, S.R. (2016). Cellular Taxonomy of the  
495 Mouse Striatum as Revealed by Single-Cell RNA-Seq. *Cell Rep.* *16*, 1126–1137.
- 496 52. Breton, G., Zheng, S., Valieris, R., Tojal da Silva, I., Satija, R., and Nussenzweig, M.C.  
497 (2016). Human dendritic cells (DCs) are derived from distinct circulating precursors that  
498 are precommitted to become CD1c+ or CD141+ DCs. *J. Exp. Med.* *213*, 2861–2870.
- 499 53. Mohammed, H., Hernando-Herraez, I., Savino, A., Scialdone, A., Macaulay, I., Mulas, C.,  
500 Chandra, T., Voet, T., Dean, W., Nichols, J., et al. (2017). Single-Cell Landscape of  
501 Transcriptional Heterogeneity and Cell Fate Decisions during Mouse Early Gastrulation.  
502 *Cell Rep.* *20*, 1215–1228.
- 503 54. Campbell, J.N., Macosko, E.Z., Fenselau, H., Pers, T.H., Lyubetskaya, A., Tenen, D.,  
504 Goldman, M., Verstegen, A.M.J., Resch, J.M., McCarroll, S.A., et al. (2017). A  
505 molecular census of arcuate hypothalamus and median eminence cell types. *Nat.*  
506 *Neurosci.* *20*, 484–496.
- 507 55. Haber, A.L., Biton, M., Rogel, N., Herbst, R.H., Shekhar, K., Smillie, C., Burgin, G.,  
508 Delorey, T.M., Howitt, M.R., Katz, Y., et al. (2017). A single-cell survey of the small  
509 intestinal epithelium. *Nature* *551*, 333–339.
- 510 56. Alles, J., Karaiskos, N., Praktijnjo, S.D., Grosswendt, S., Wahle, P., Ruffault, P.-L., Ayoub,  
511 S., Schreyer, L., Boltengagen, A., Birchmeier, C., et al. (2017). Cell fixation and  
512 preservation for droplet-based single-cell transcriptomics. *BMC Biol.* *15*, 44.
- 513 57. Darmanis, S., Sloan, S.A., Zhang, Y., Enge, M., Caneda, C., Shuer, L.M., Hayden Gephart,  
514 M.G., Barres, B.A., and Quake, S.R. (2015). A survey of human brain transcriptome  
515 diversity at the single cell level. *Proc. Natl. Acad. Sci. U. S. A.* *112*, 7285–7290.
- 516 58. Hu, P., Fabyanic, E., Kwon, D.Y., Tang, S., Zhou, Z., and Wu, H. (2017). Dissecting Cell-  
517 Type Composition and Activity-Dependent Transcriptional State in Mammalian Brains  
518 by Massively Parallel Single-Nucleus RNA-Seq. *Mol. Cell* *68*, 1006–1015.e7.

- 519 59. Bulik-Sullivan, B.K., Loh, P.-R., Finucane, H.K., Ripke, S., Yang, J., Schizophrenia  
520 Working Group of the Psychiatric Genomics Consortium, Patterson, N., Daly, M.J.,  
521 Price, A.L., and Neale, B.M. (2015). LD Score regression distinguishes confounding  
522 from polygenicity in genome-wide association studies. *Nat. Genet.* *47*, 291–295.
- 523 60. Shi, H., Kichaev, G., and Pasaniuc, B. (2016). Contrasting the Genetic Architecture of 30  
524 Complex Traits from Summary Association Data. *Am. J. Hum. Genet.* *99*, 139–153.
- 525 61. Chammas, M., Bousquet, P., Renard, E., Poirier, J.-L., Jaffiol, C., and Allieu, Y. (1995).  
526 Dupuytren’s disease, carpal tunnel syndrome, trigger finger, and diabetes mellitus. *J.*  
527 *Hand Surg. Am.* *20*, 109–114.
- 528 62. Sanderson, P.L., Morris, M.A., Stanley, J.K., and Fahmy, N.R. (1992). Lipids and  
529 Dupuytren’s disease. *J. Bone Joint Surg. Br.* *74-B*, 923–927.
- 530 63. Hacquebord, J.H., Chiu, V.Y., and Harness, N.G. (2017). The Risk of Dupuytren Diagnosis  
531 in Obese Individuals. *J. Hand Surg. Am.* *42*, 149–155.
- 532 64. Voight, B.F., Kang, H.M., Ding, J., Palmer, C.D., Sidore, C., Chines, P.S., Burt, N.P.,  
533 Fuchsberger, C., Li, Y., Erdmann, J., et al. (2012). The metabochip, a custom genotyping  
534 array for genetic studies of metabolic, cardiovascular, and anthropometric traits. *PLoS*  
535 *Genet.* *8*, e1002793.
- 536 65. Finucane, H.K., Bulik-Sullivan, B., Gusev, A., Trynka, G., Reshef, Y., Loh, P.-R., Anttila,  
537 V., Xu, H., Zang, C., Farh, K., et al. (2015). Partitioning heritability by functional  
538 annotation using genome-wide association summary statistics. *Nat. Genet.* *47*, 1228–  
539 1235.
- 540 66. Horikoshi, M., Beaumont, R.N., Day, F.R., Warrington, N.M., Kooijman, M.N., Fernandez-  
541 Tajes, J., Feenstra, B., van Zuydam, N.R., Gaulton, K.J., Grarup, N., et al. (2016).  
542 Genome-wide associations for birth weight and correlations with adult disease. *Nature*  
543 *538*, 248–252.
- 544 67. Wood, A.R., Esko, T., Yang, J., Vedantam, S., Pers, T.H., Gustafsson, S., Chu, A.Y.,  
545 Estrada, K., Luan, J., Tan, K., Kutalik, Z., et al. (2014). Defining the role of common variation  
546 in the genomic and biological architecture of adult human height. *Nat. Genet.* *46*, 1173–  
547 1186.
- 548 68. Bycroft, C., Freeman, C., Petkova, D., Band, G., Elliott, L.T., Sharp, K., Motyer, A.,  
549 Vukcevic, D., Delaneau, O., O’Connell, J., et al. (2018). The UK Biobank resource with  
550 deep phenotyping and genomic data. *Nature* *562*, 203–209.
- 551 69. Felix, J.F., Bradfield, J.P., Monnereau, C., van der Valk, R.J.P., Stergiakouli, E., Chesi, A.,  
552 Gaillard, R., Feenstra, B., Thiering, E., Kreiner-Møller, E., et al. (2016). Genome-wide  
553 association analysis identifies three new susceptibility loci for childhood body mass  
554 index. *Hum. Mol. Genet.* *25*, 389–403.
- 555 70. Dupuis, J., Langenberg, C., Prokopenko, I., Saxena, R., Soranzo, N., Jackson, A.U., Wheeler,  
556 E., Glazer, N.L., Bouatia-Naji, N., Gloyn, A.L., et al. (2010). New genetic loci implicated  
557 in fasting glucose homeostasis and their impact on type 2 diabetes risk. *Nat. Genet.* *42*,  
558 105–116.
- 559 71. van der Harst, P., Zhang, W., Mateo Leach, I., Rendon, A., Verweij, N., Sehmi, J., Paul,  
560 D.S., Elling, U., Allayee, H., Li, X., et al. (2012). Seventy-five genetic loci influencing  
561 the human red blood cell. *Nature* *492*, 369–375.
- 562 72. Soranzo, N., Sanna, S., Wheeler, E., Gieger, C., Radke, D., Dupuis, J., Bouatia-Naji, N.,  
563 Langenberg, C., Prokopenko, I., Stolerman, E., et al. (2010). Common variants at 10  
564 genomic loci influence hemoglobin A<sub>1c</sub> levels via glycemic and nonglycemic

- 565 pathways. *Diabetes* 59, 3229–3239.
- 566 73. Gieger, C., Radhakrishnan, A., Cvejic, A., Tang, W., Porcu, E., Pistis, G., Serbanovic-Canic,  
567 J., Elling, U., Goodall, A.H., Labrune, Y., et al. (2011). New gene functions in  
568 megakaryopoiesis and platelet formation. *Nature* 480, 201–208.
- 569 74. Teumer, A., Tin, A., Sorice, R., Gorski, M., Yeo, N.C., Chu, A.Y., Li, M., Li, Y., Mijatovic,  
570 V., Ko, Y.-A., et al. (2016). Genome-wide Association Studies Identify Genetic Loci  
571 Associated With Albuminuria in Diabetes. *Diabetes* 65, 803–817.
- 572 75. Pattaro, C., Teumer, A., Gorski, M., Chu, A.Y., Li, M., Mijatovic, V., Garnaas, M., Tin, A.,  
573 Sorice, R., Li, Y., et al. (2016). Genetic associations at 53 loci highlight cell types and  
574 biological pathways relevant for kidney function. *Nat. Commun.* 7, 10023.
- 575 76. Eppinga, R.N., Hagemeyer, Y., Burgess, S., Hinds, D.A., Stefansson, K., Gudbjartsson, D.F.,  
576 van Veldhuisen, D.J., Munroe, P.B., Verweij, N., and van der Harst, P. (2016).  
577 Identification of genomic loci associated with resting heart rate and shared genetic  
578 predictors with all-cause mortality. *Nat. Genet.* 48, 1557–1563.
- 579 77. Nikpay, M., Goel, A., Won, H.-H., Hall, L.M., Willenborg, C., Kanoni, S., Saleheen, D.,  
580 Kyriakou, T., Nelson, C.P., Hopewell, J.C., et al. (2015). A comprehensive 1,000  
581 Genomes-based genome-wide association meta-analysis of coronary artery disease. *Nat.*  
582 *Genet.* 47, 1121–1130.
- 583 78. Willer, C.J., Schmidt, E.M., Sengupta, S., Peloso, G.M., Gustafsson, S., Kanoni, S., Ganna,  
584 A., Chen, J., Buchkovich, M.L., Mora, S., et al. (2013). Discovery and refinement of loci  
585 associated with lipid levels. *Nat. Genet.* 45, 1274–1283.
- 586 79. Liu, J.Z., van Sommeren, S., Huang, H., Ng, S.C., Alberts, R., Takahashi, A., Ripke, S., Lee,  
587 J.C., Jostins, L., Shah, T., et al. (2015). Association analyses identify 38 susceptibility  
588 loci for inflammatory bowel disease and highlight shared genetic risk across populations.  
589 *Nat. Genet.* 47, 979–986.
- 590 80. Okada, Y., Wu, D., Trynka, G., Raj, T., Terao, C., Ikari, K., Kochi, Y., Ohmura, K., Suzuki,  
591 A., Yoshida, S., et al. (2014). Genetics of rheumatoid arthritis contributes to biology and  
592 drug discovery. *Nature* 506, 376–381.
- 593 81. Otowa, T., Hek, K., Lee, M., Byrne, E.M., Mirza, S.S., Nivard, M.G., Bigdeli, T., Aggen,  
594 S.H., Adkins, D., Wolen, A., et al. (2016). Meta-analysis of genome-wide association  
595 studies of anxiety disorders. *Mol. Psychiatry* 21, 1485.
- 596 82. Major Depressive Disorder Working Group of the Psychiatric GWAS Consortium, Ripke, S.,  
597 Wray, N.R., Lewis, C.M., Hamilton, S.P., Weissman, M.M., Breen, G., Byrne, E.M.,  
598 Blackwood, D.H.R., Boomsma, D.I., et al. (2013). A mega-analysis of genome-wide  
599 association studies for major depressive disorder. *Mol. Psychiatry* 18, 497–511.
- 600 83. Psychiatric GWAS Consortium Bipolar Disorder Working Group (2011). Large-scale  
601 genome-wide association analysis of bipolar disorder identifies a new susceptibility locus  
602 near ODZ4. *Nat. Genet.* 43, 977–983.
- 603 84. Schizophrenia Working Group of the Psychiatric Genomics Consortium (2014). Biological  
604 insights from 108 schizophrenia-associated genetic loci. *Nature* 511, 421–427.
- 605 85. Okbay, A., Baselmans, B.M.L., De Neve, J.-E., Turley, P., Nivard, M.G., Fontana, M.A.,  
606 Meddens, S.F.W., Linnér, R.K., Rietveld, C.A., Derringer, J., et al. (2016). Genetic  
607 variants associated with subjective well-being, depressive symptoms, and neuroticism  
608 identified through genome-wide analyses. *Nat. Genet.* 48, 624–633.
- 609 86. Springelkamp, H., Iglesias, A.I., Mishra, A., Höhn, R., Wojciechowski, R., Khawaja, A.P.,  
610 Nag, A., Wang, Y.X., Wang, J.J., Cuellar-Partida, G., et al. (2017). New insights into the

611 genetics of primary open-angle glaucoma based on meta-analyses of intraocular pressure  
612 and optic disc characteristics. *Hum. Mol. Genet.* 26, 438–453.  
613 87. Michailidou, K., Lindström, S., Dennis, J., Beesley, J., Hui, S., Kar, S., Lemaçon, A., Soucy,  
614 P., Glubb, D., Rostamianfar, A., et al. (2017). Association analysis identifies 65 new  
615 breast cancer risk loci. *Nature* 551, 92–94.



## 616 FIGURE TITLES AND LEGENDS

617 **Figure 1: DD TWAS and GWAS associations.** Shown here are Manhattan plots for TWAS  
618 associations (top) and GWAS associations (bottom). For TWAS associations, each point  
619 corresponds to an association test between tissue-specific predicted gene expression and DD,  
620 with the orange line representing the threshold for significance in log-scale ( $P_{TWAS} \leq 5.09 \times$   
621  $10^{-7}$ ). The most significant tissue-specific gene model for each peak is labeled by gene. For  
622 GWAS associations, each point corresponds to an association test between a SNP and DD, with  
623 the orange line representing the traditional genome-wide significance threshold in log-scale  
624 ( $P_{GWAS} \leq 5 \times 10^{-8}$ ).

625  
626 **Figure 2: Novel risk region identified on chromosome 17.** Shown here is the novel risk region  
627 identified through TWAS; the grey points are GWAS SNPs association strength and the blue  
628 points are the GWAS SNPs association strength conditioned on the *TMEM106A* expression  
629 model (green, significant in GTEx breast mammary tissue). This tissue-specific model was still  
630 significant under 1,347 permutations ( $P_{perm} = 8.9 \times 10^{-3}$ ).

631  
632 **Figure 3: Tentative evidence for putative causality with DD.** Here we show the genetic  
633 correlation for three different pairs of traits (DD/BMI, left; DD/TG, center; and BMI/TG, right)  
634 between four groupings of SNPs: (1) GWAS-significant SNPs specific to trait 1, (2) GWAS-  
635 significant SNPs specific to trait 2, (3) GWAS-significant SNPs for both trait 1 and trait 2, and  
636 (4) all non-significant SNPs shared between studies. In the left plot, since GWAS-significant  
637 SNPs specific to BMI have more enrichment of genetic correlation compared to those specific to  
638 DD, we can putatively interpret that BMI SNPs are driving the shared genetic etiology. The same  
639 can be said for the middle plot with TG. On the right, for completeness, we show the same  
640 correlation for BMI and TG, which was significant. Error bars are defined by the genetic  
641 correlation  $\pm 1.96$  times the s.e. for each grouping of SNPs.

642 TABLES

643 **Table 1: 43 significant tissue-specific gene expression models from TWAS.** These are the 43  
 644 significant ( $P_{TWAS} \leq 0.05/98,147$ ) tissue-specific gene models across 18 genes.

| Gene             | Chr  | TSS         | TES         | Best GWAS SNP | $Z_{GWAS}$ | Reference Tissue Panel                   | $cis-h_g^2$ | $P_{TWAS}$ |
|------------------|------|-------------|-------------|---------------|------------|------------------------------------------|-------------|------------|
| PJA2             | 5    | 108,670,409 | 108,745,675 | rs414724      | -6.4       | GTEX.Nerve_Tibial                        | 0.09        | 1.1E-07    |
| CTD-2587M2.1     | 5    | 108,572,821 | 108,662,070 | rs414724      | -6.4       | METSIM.ADIPOSE.RNASEQ                    | 0.18        | 3.3E-10    |
| MAN2A1           | 5    | 109,025,066 | 109,205,326 | rs414724      | -6.4       | GTEX.Nerve_Tibial                        | 0.07        | 2.4E-08    |
| SDK1             | 7    | 3,341,079   | 4,308,631   | rs10264803    | -6.0       | GTEX.Cells_Transformed_fibroblasts       | 0.17        | 3.3E-09    |
|                  |      |             |             |               |            | GTEX.Esophagus_Muscularis                | 0.08        | 6.4E-08    |
| EPDR1            | 7    | 37,960,162  | 37,991,542  | rs17171240    | 14.7       | GTEX.Lung                                | 0.15        | 6.4E-31    |
|                  |      |             |             |               |            | GTEX.Adipose_Subcutaneous                | 0.12        | 5.1E-23    |
|                  |      |             |             |               |            | GTEX.Pancreas                            | 0.19        | 4.6E-18    |
|                  |      |             |             |               |            | GTEX.Esophagus_Muscularis                | 0.35        | 6.6E-14    |
|                  |      |             |             |               |            | YFS.BLOOD.RNAARR                         | 0.18        | 1.4E-13    |
|                  |      |             |             |               |            | GTEX.Nerve_Tibial                        | 0.30        | 5.0E-09    |
|                  |      |             |             |               |            | GTEX.Artery_Tibial                       | 0.27        | 1.5E-08    |
|                  |      |             |             |               |            | GTEX.Thyroid                             | 0.19        | 5.4E-08    |
|                  |      |             |             |               |            | GTEX.Cells_Transformed_fibroblasts       | 0.21        | 1.9E-07    |
| CMC.BRAIN.RNASEQ | 0.24 | 3.1E-07     |             |               |            |                                          |             |            |
| TRGC2            | 7    | 38,279,181  | 38,289,173  | rs17171240    | 14.7       | GTEX.Prostate                            | 0.37        | 1.4E-12    |
| SULF1            | 8    | 70,378,858  | 70,573,147  | rs542288      | 11.8       | GTEX.Artery_Aorta                        | 0.27        | 4.0E-25    |
| RSPO2            | 8    | 108,911,543 | 109,095,913 | rs612265      | -9.3       | CMC.BRAIN.RNASEQ                         | 0.12        | 1.2E-08    |
| EIF3E            | 8    | 109,213,971 | 109,260,959 | rs612265      | -9.3       | CMC.BRAIN.RNASEQ                         | 0.07        | 7.6E-21    |
|                  |      |             |             |               |            | YFS.BLOOD.RNAARR                         | 0.01        | 1.4E-15    |
|                  |      |             |             |               |            | GTEX.Brain_Cerebellum                    | 0.16        | 1.8E-11    |
| EMC2             | 8    | 109,455,852 | 109,499,136 | rs612265      | -9.3       | GTEX.Muscle_Skeletal                     | 0.05        | 8.9E-12    |
|                  |      |             |             |               |            | GTEX.Esophagus_Gastroesophageal_Junction | 0.09        | 1.3E-09    |
|                  |      |             |             |               |            | GTEX.Brain_Cerebellum                    | 0.29        | 1.6E-08    |
| MRPL52           | 14   | 23,299,091  | 23,304,246  | rs1042704     | 7.3        | YFS.BLOOD.RNAARR                         | 0.44        | 1.1E-07    |
| NEDD4            | 15   | 56,119,116  | 56,285,944  | rs8032158     | 5.2        | GTEX.Artery_Tibial                       | 0.18        | 2.6E-07    |
| BCAR1            | 16   | 75,262,927  | 75,301,951  | rs977987      | 5.9        | GTEX.Artery_Aorta                        | 0.18        | 2.8E-07    |
|                  |      |             |             |               |            | GTEX.Esophagus_Mucosa                    | 0.16        | 3.6E-07    |

|                    |      |            |            |            |      |                                         |      |         |
|--------------------|------|------------|------------|------------|------|-----------------------------------------|------|---------|
| CFDP1              | 16   | 75,327,607 | 75,467,387 | rs977987   | 5.9  | YFS.BLOOD.RNAARR                        | 0.21 | 5.6E-08 |
| TMEM170A           | 16   | 75,480,922 | 75,498,584 | rs977987   | 5.9  | GTEEx.Cells_EBV-transformed_lymphocytes | 0.13 | 1.4E-09 |
|                    |      |            |            |            |      | GTEEx.Skin_Sun_Exposed_Lower_leg        | 0.14 | 2.7E-08 |
|                    |      |            |            |            |      | GTEEx.Skin_Not_Sun_Exposed_Suprapubic   | 0.09 | 3.9E-08 |
| TMEM106A           | 17   | 41,363,845 | 41,372,057 | rs4793248  | 4.1  | GTEEx.Breast_Mammary_Tissue             | 0.12 | 1.2E-07 |
| ATXN10             | 22   | 46,067,677 | 46,241,187 | rs34088184 | 13.8 | GTEEx.Cells_Transformed_fibroblasts     | 0.17 | 1.7E-07 |
| LINC00899          | 22   | 46,435,786 | 46,440,748 | rs34088184 | 13.8 | GTEEx.Adipose_Subcutaneous              | 0.17 | 2.8E-32 |
|                    |      |            |            |            |      | GTEEx.Muscle_Skeletal                   | 0.24 | 1.6E-26 |
|                    |      |            |            |            |      | GTEEx.Cells_Transformed_fibroblasts     | 0.18 | 1.9E-26 |
|                    |      |            |            |            |      | GTEEx.Artery_Tibial                     | 0.30 | 5.6E-23 |
|                    |      |            |            |            |      | GTEEx.Esophagus_Muscularis              | 0.36 | 2.3E-15 |
|                    |      |            |            |            |      | GTEEx.Lung                              | 0.21 | 5.7E-15 |
|                    |      |            |            |            |      | GTEEx.Adrenal_Gland                     | 0.68 | 9.2E-15 |
|                    |      |            |            |            |      | GTEEx.Artery_Coronary                   | 0.56 | 1.6E-09 |
| GTEEx.Nerve_Tibial | 0.35 | 3.4E-08    |            |            |      |                                         |      |         |

645  
646  
647  
648

**Table 2: Genetic correlation results between DD and 45 other traits.** We have grouped related traits under the “Type” column. The four traits that were significantly ( $P_{T_1, T_2} \leq 0.05/45$ ) correlated with DD are shown in italics.

| Type                                  | Trait                                            | Sample Size   | SNP- $\hat{h}_g^2$ (s.e.) | $\hat{r}_g$ (s.e.)   | $P_{T_1, T_2}$ |
|---------------------------------------|--------------------------------------------------|---------------|---------------------------|----------------------|----------------|
| Skeletal Traits                       | Birth Weight <sup>66</sup>                       | 153781        | 0.1 (0.007)               | -0.051 (0.05)        | 3.0E-01        |
|                                       | Height <sup>67</sup>                             | 253288        | 0.34 (0.017)              | 0.063 (0.03)         | 7.3E-02        |
|                                       | <i>Body Mass Index<sup>68</sup></i>              | <i>336107</i> | <i>0.25 (0.009)</i>       | <i>-0.196 (0.04)</i> | <i>1.6E-06</i> |
|                                       | Childhood Body Mass Index <sup>69</sup>          | 35668         | 0.25 (0.024)              | 0.005 (0.06)         | 9.3E-01        |
|                                       | Heel Bone Material Density <sup>68</sup>         | 194398        | 0.28 (0.025)              | 0.057 (0.05)         | 2.1E-01        |
| Blood and Diabetes Traits             | Fasting Glucose <sup>70</sup>                    | 46186         | 0.08 (0.014)              | 0.011 (0.09)         | 9.0E-01        |
|                                       | Fasting Insulin <sup>70</sup>                    | 46186         | 0.06 (0.01)               | -0.092 (0.09)        | 2.9E-01        |
|                                       | <i>Type II Diabetes<sup>68</sup></i>             | <i>336473</i> | <i>0.04 (0.003)</i>       | <i>-0.182 (0.05)</i> | <i>1.7E-04</i> |
|                                       | Hemoglobin <sup>71</sup>                         | 135367        | 0.09 (0.013)              | 0.131 (0.08)         | 1.1E-01        |
|                                       | Hemoglobin A1C <sup>72</sup>                     | 46368         | 0.06 (0.011)              | -0.101 (0.09)        | 2.8E-01        |
|                                       | Packed Cell Volume <sup>71</sup>                 | 135367        | 0.08 (0.014)              | 0.171 (0.09)         | 5.2E-02        |
|                                       | Mean Cell Hemoglobin <sup>71</sup>               | 135367        | 0.22 (0.026)              | -0.014 (0.04)        | 7.4E-01        |
|                                       | Mean Cell Hemoglobin Concentration <sup>71</sup> | 172433        | 0.03 (0.011)              | -0.047 (0.11)        | 6.8E-01        |
| Mean Corpuscular Volume <sup>71</sup> | 172433                                           | 0.24 (0.025)  | -0.001 (0.04)             | 9.8E-01              |                |

|                       |                                                 |        |              |               |         |
|-----------------------|-------------------------------------------------|--------|--------------|---------------|---------|
|                       | Red Blood Cell Count <sup>71</sup>              | 35604  | 0.13 (0.019) | 0.139 (0.08)  | 6.8E-02 |
|                       | Platelet Count <sup>73</sup>                    | 66867  | 0.11 (0.011) | -0.117 (0.06) | 4.1E-02 |
| Renal Traits          | Chronic Kidney Disease <sup>74,75</sup>         | 117165 | 0.02 (0.006) | -0.13 (0.12)  | 2.7E-01 |
|                       | Urine Albumin-to-Creatinine Ratio <sup>74</sup> | 51886  | 0.04 (0.009) | 0.07 (0.11)   | 5.3E-01 |
|                       | Microalbuminuria <sup>74</sup>                  | 51886  | 0.01 (0.008) | 0.04 (0.17)   | 8.2E-01 |
| Cardiovascular Traits | Resting Heart Rate <sup>76</sup>                | 134251 | 0.14 (0.012) | 0.045 (0.05)  | 3.5E-01 |
|                       | Coronary Artery Disease <sup>77</sup>           | 184305 | 0.07 (0.005) | -0.098 (0.05) | 6.9E-02 |
|                       | <i>Triglycerides</i> <sup>78</sup>              | 188577 | 0.26 (0.057) | -0.139 (0.04) | 3.5E-04 |
|                       | <i>High Density Lipoprotein</i> <sup>78</sup>   | 188577 | 0.24 (0.036) | 0.133 (0.04)  | 4.1E-04 |
|                       | Low Density Lipoprotein <sup>78</sup>           | 188577 | 0.2 (0.048)  | -0.043 (0.04) | 2.8E-01 |
|                       | Total Cholesterol <sup>78</sup>                 | 188577 | 0.21 (0.046) | -0.033 (0.04) | 3.9E-01 |
| Autoimmune Traits     | Crohn's Disease <sup>79</sup>                   | 27726  | 0.38 (0.047) | 0.009 (0.07)  | 9.0E-01 |
|                       | Inflammatory Bowel Disease <sup>79</sup>        | 34694  | 0.32 (0.035) | 0.021 (0.07)  | 7.7E-01 |
|                       | Ulcerative Colitis <sup>79</sup>                | 28738  | 0.22 (0.032) | 0.073 (0.08)  | 3.5E-01 |
|                       | Rheumatoid Arthritis <sup>80</sup>              | 58284  | 0.15 (0.028) | 0.124 (0.05)  | 2.1E-02 |
| Neurological Traits   | Anxiety Case-Control <sup>81</sup>              | 18000  | 0.07 (0.03)  | 0.082 (0.17)  | 6.3E-01 |
|                       | Major Depressive Disorder <sup>82</sup>         | 18759  | 0.15 (0.03)  | 0.012 (0.11)  | 9.2E-01 |
|                       | Bipolar Disorder <sup>83</sup>                  | 16731  | 0.45 (0.042) | 0.101 (0.08)  | 2.0E-01 |
|                       | Schizophrenia <sup>84</sup>                     | 150064 | 0.45 (0.018) | 0.064 (0.04)  | 1.2E-01 |
|                       | Neuroticism <sup>85</sup>                       | 170911 | 0.09 (0.006) | -0.067 (0.05) | 2.1E-01 |
| Eye Traits            | Glaucoma <sup>68</sup>                          | 108817 | 0.04 (0.005) | 0.06 (0.08)   | 4.6E-01 |
|                       | Myopia <sup>68</sup>                            | 335700 | 0.03 (0.002) | 0.039 (0.06)  | 5.4E-01 |
|                       | Intraocular Pressure <sup>86</sup>              | 29578  | 0.13 (0.021) | 0.061 (0.09)  | 4.7E-01 |
|                       | Cup Area <sup>86</sup>                          | 22489  | 0.28 (0.037) | 0.098 (0.06)  | 9.9E-02 |
|                       | Disc Area <sup>86</sup>                         | 22504  | 0.3 (0.072)  | 0.035 (0.06)  | 5.9E-01 |
|                       | Vertical Cup-Disc Ratio <sup>86</sup>           | 23899  | 0.33 (0.045) | 0.099 (0.05)  | 6.1E-02 |
| Other Traits          | Subjective Well-being <sup>85</sup>             | 298420 | 0.03 (0.002) | 0.07 (0.06)   | 2.7E-01 |
|                       | Asthma <sup>68</sup>                            | 83529  | 0.07 (0.01)  | 0.116 (0.07)  | 1.1E-01 |
|                       | Breast Cancer <sup>87</sup>                     | 228951 | 0.13 (0.011) | 0.076 (0.04)  | 7.3E-02 |
|                       | Hand Grip Strength (left) <sup>68</sup>         | 335821 | 0.1 (0.004)  | -0.005 (0.04) | 9.1E-01 |
|                       | Hand Grip Strength (right) <sup>68</sup>        | 335842 | 0.1 (0.004)  | 0.003 (0.04)  | 9.3E-01 |

649  
650  
651  
652  
653

**Table 3: Regions with significant genetic correlation between DD and other traits.** This table lists the eight regions demonstrating significant genetic correlation between DD and BMI, and the three regions demonstrating significant correlation between DD and HDL; significance was assessed at a Bonferroni-corrected threshold of  $P_{region} \leq 0.05/1702$  for each trait. Also

654 included is the number of SNPs within each region (“# SNPs”) as well as the minimum GWAS  
 655 association p-value for either BMI or HDL (“Min. Trait  $P_{GWAS}$ ”) and DD (“Min. DD  $P_{GWAS}$ ”).  
 656 All other regions demonstrated no significant genetic correlation between DD and any trait  
 657 tested.

| Trait | Chr | Start     | End       | # SNPs | Min. Trait $P_{GWAS}$ | Min. DD $P_{GWAS}$ | $\hat{r}_{g,local}$ | s.e.     | $P_{region}$ |
|-------|-----|-----------|-----------|--------|-----------------------|--------------------|---------------------|----------|--------------|
| BMI   | 1   | 21736588  | 23086883  | 2566   | 9.6E-05               | 1.8E-12            | -0.00082            | 0.00017  | 1.6E-06      |
| BMI   | 1   | 189904130 | 191868930 | 3313   | 4.7E-14               | 5.0E-05            | -0.00093            | 0.0002   | 2.3E-06      |
| BMI   | 2   | 209941529 | 212379518 | 1668   | 1.2E-10               | 0.00129            | -0.00099            | 0.00023  | 1.3E-05      |
| BMI   | 3   | 49316972  | 51832015  | 1872   | 9.4E-40               | 0.00230            | -0.00146            | 0.00027  | 5.6E-08      |
| BMI   | 3   | 51832015  | 54081390  | 2225   | 2.6E-10               | 0.00061            | -0.00105            | 0.00022  | 2.3E-06      |
| BMI   | 4   | 43965045  | 45189157  | 2525   | 9.6E-33               | 9.2E-05            | -0.00101            | 0.00023  | 1.5E-05      |
| BMI   | 4   | 45189157  | 47411896  | 2781   | 3.2E-12               | 0.00026            | -0.00079            | 0.00018  | 1.2E-05      |
| BMI   | 6   | 28917608  | 29737971  | 60     | 5.3E-09               | 0.01434            | 0.00041             | 9.00E-05 | 1.6E-05      |
| HDL   | 7   | 37555184  | 38966703  | 1221   | 0.00018               | 3.4E-49            | -0.00131            | 0.00031  | 2.0E-05      |
| HDL   | 9   | 1079707   | 1916877   | 1143   | 0.00018               | 2.8E-15            | 0.00142             | 0.0003   | 1.5E-06      |
| HDL   | 12  | 39227169  | 40816185  | 1246   | 0.01077               | 0.00019            | 0.00116             | 0.00027  | 1.5E-05      |

658

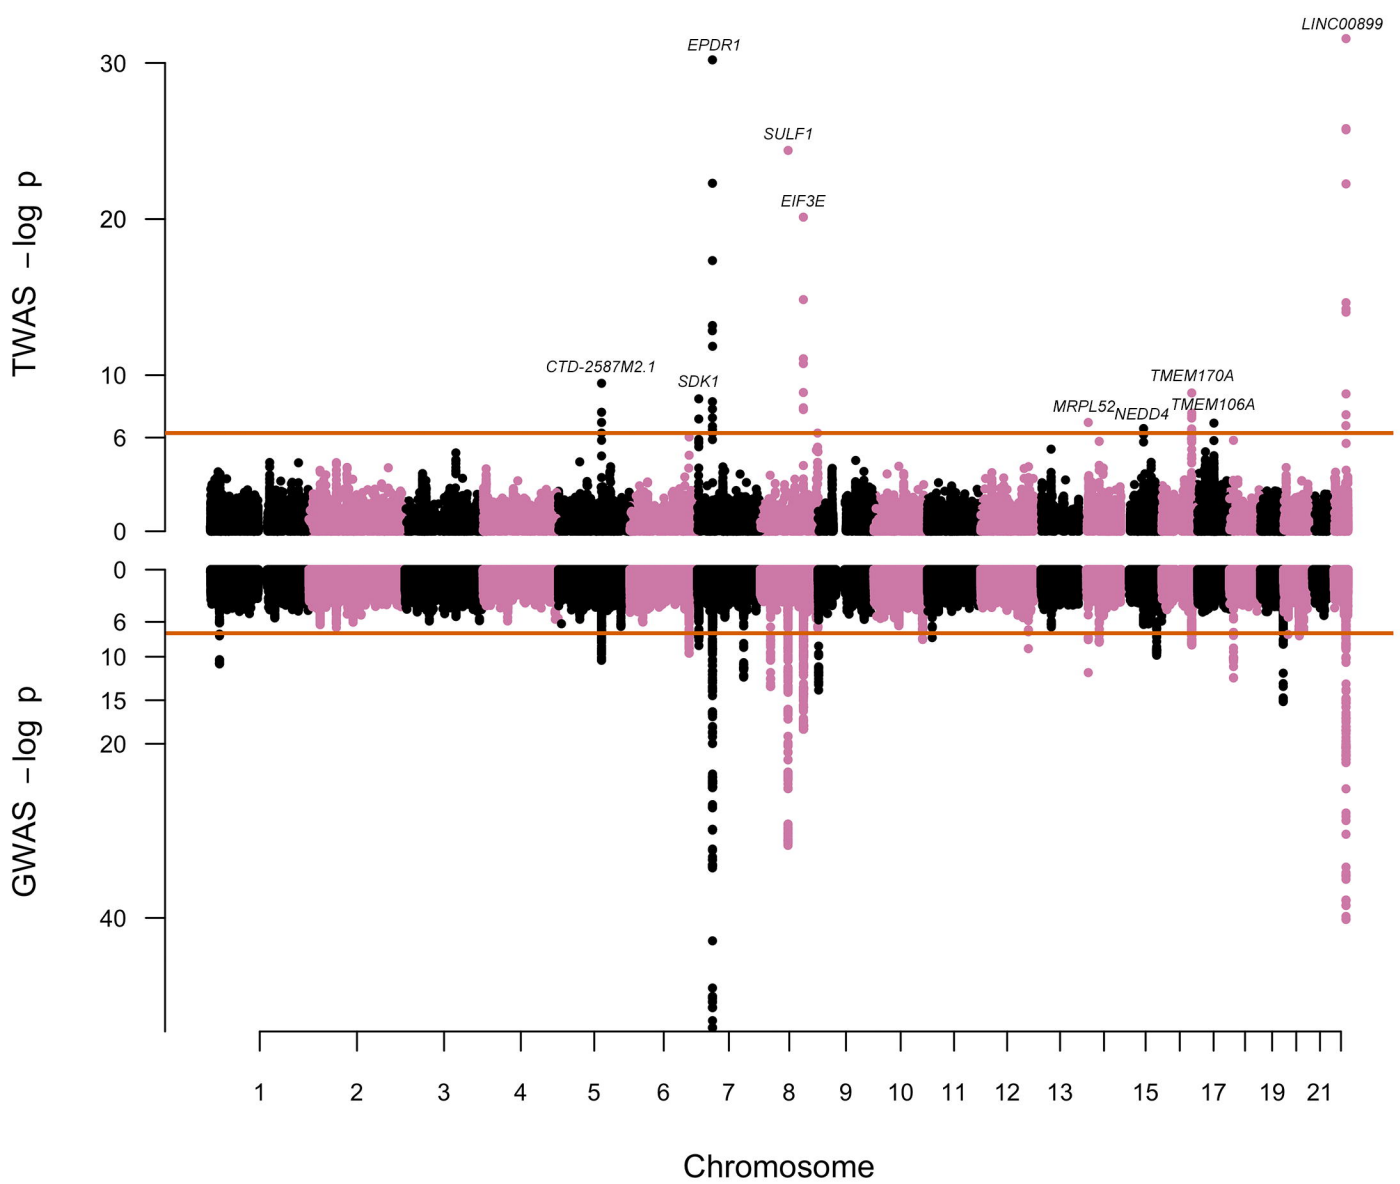

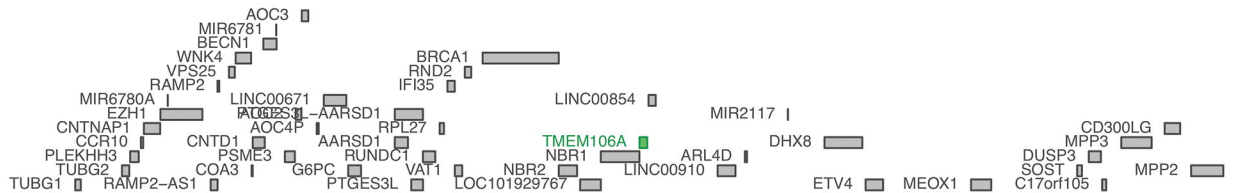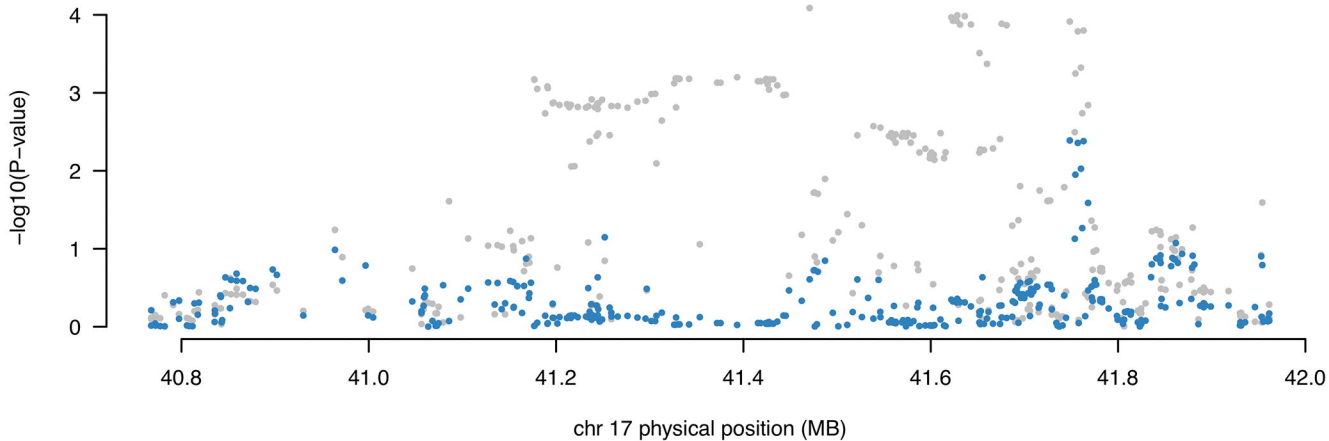

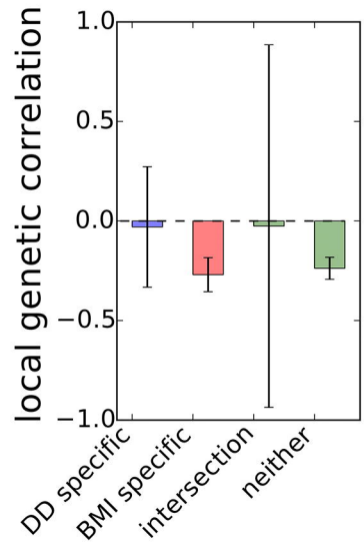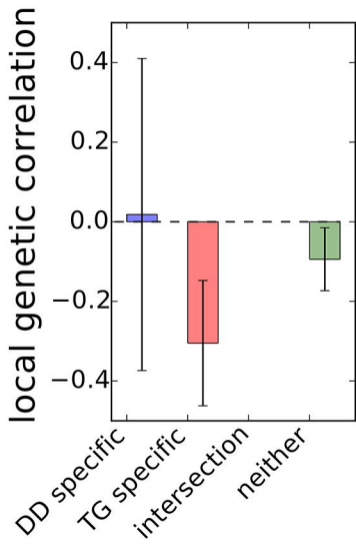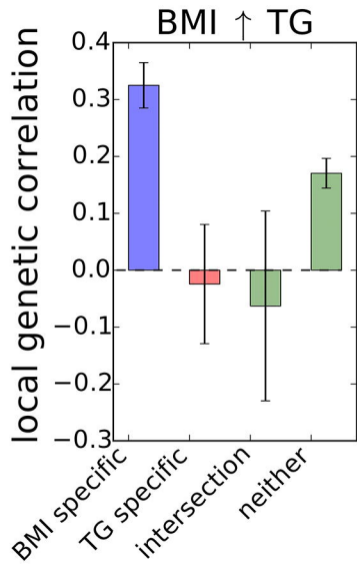

Source: http://biorxiv.org/content/10.1101/499368v1.full.pdf
